# Supplementary material
Source: bioRxiv or medRxiv preprint supplement (https://www.biorxiv.org/highwire/filestream/75966/field_highwire_adjunct_files/0/248195-1.pdf)
Supplement: Supplementary file [file 248195-1.pdf]

# Patterns of polymorphism, selection and linkage disequilibrium in the subgenomes of the allopolyploid *Arabidopsis kamchatica*

## Supplementary Material

### Reference genome assembly of *A. lyrata* subsp. *petraea*

We assembled the genomes of *A. halleri* subsp. *gemmifera* (W302) collected from Tada mine in Japan and *A. lyrata* subsp. *petraea* (lyrpet4) collected from Siberia representing each of the closest known diploid parents of *A. kamchatica*<sup>1,2</sup>. Both *A. halleri* and *A. lyrata* are predominantly self-incompatible (SI). To reduce heterozygosity, we selfed *A. halleri* five times using bud pollination<sup>3</sup>. The Siberian *A. lyrata* genotype (lyrpet4) lost SI in its natural habitat, so we were able to perform two rounds of regular self-fertilization. Previously, we reported medium quality assemblies (v1.0) for both of these genotypes<sup>4</sup> as well as an improved version of *A. halleri*<sup>5</sup>. Here, we provide an improved version of the *A. lyrata* lyrpet4 assembly that was generated using the pipeline described in Briskine et al.<sup>5</sup> for *A. halleri* W302 and we refer to the new assemblies as version 2.2 (v2.2).

We created long-insert mate-pair libraries to complement the short-insert libraries published in Akama et al. (2014). We used selfed *A. lyrata* lyrpet4 leaf tissue to construct the mate-pair libraries with Illumina Nextera Mate-Pair Library Prep kit modified for large insert sizes. After tagmentation with Mate Pair Tagment Enzyme, the DNA was separated by pulse field electrophoresis into variable ranges of 22-38 kb, 15-22 kb, 11-15 kb, 7-11 kb, 5.0-7 kb, and 3.0-5.0 kb. For each range, 270 – 600 ng of DNA was recovered using a Zymoclean Large Fragment DNA Recovery Kit. After circularization, exonuclease treatment, fragmentation with Covaris S1, A-tailing, and adapter ligation, 14 cycles of PCR were carried out for 22-38 kb, 15-22 kb, and 11-15 kb fraction, and 10 cycles for the 7-11 kb, 5.0-7kb, and 3.0-5.0 kb fractions. After quantification of the libraries by qPCR using KAPA Library Quantification Kit for Illumina platforms, 4 additional cycles of PCR were performed for the 22-38 kb and 7-11 kb fractions. The libraries were purified with an AMPure XP kit, quantified with the KAPA kit again, and mixed based on the measurement. The libraries were sequenced on Illumina HiSeq 2500 at the Functional Genomics Center Zurich (<http://www.fgc.zh.ch>).

The *A. lyrata* genome was assembled from all available untrimmed read libraries with ALLPATHS-LG R50599<sup>6</sup> using the default parameters in two steps. In the first step, we specified expected insert sizes. In the second step, we switched to the insert sizes reported by ALLPATHS-LG in the first step. The assembly job had a peak memory utilization of 191 Gb and completed in 84 hours on a Linux server using 30 cores.

Code for *A. lyrata* genome assembly  
<https://gitlab.com/rbrisk/AlyrAssembly>

## Genome annotation of *A. lyrata* subsp. *petraea*

Both parental genomes were annotated using the same pipeline based on the recommendations from the AUGUSTUS Development Team<sup>7</sup>. The details for *A. halleri* can be found Briskine et al.<sup>5</sup>. Here, we provide a brief description of the *A. lyrata* lyrpet4 annotation process (see pipeline flowchart in Briskine et al.<sup>5</sup>). First, we aligned un-stranded paired-end 100 bp reads from *A. lyrata* W1739\_L2 (leaf) and W1739\_R0 (root) libraries from Paape et al.<sup>8</sup> against the *A. lyrata* lyrpet4 assembly using STAR v2.4.0i<sup>9</sup>. We extracted intron hints from the alignments and combined them with *nonexonpart* hints obtained from the RepeatMasker v4.0.5<sup>10</sup> output. The combined hints were supplied to AUGUSTUS v3.0.3 for the initial run. These obtained gene models were used to extract exon-exon junction sequences against which we aligned the original RNA-seq reads using bowtie2 v2.2.4<sup>11</sup>. We merged exon-exon junction alignments with the alignments to the complete reference genome and used the combined data to produce intron hints for the final AUGUSTUS run. Human readable functional descriptions were added using the AHRD tool<sup>12</sup>. Reciprocal best BLAST hits were calculated individually between *A. halleri* W302 or *A. lyrata* lyrpet4 and *A. thaliana* TAIR10 by aligning all coding sequences using NCBI BLAST+ v2.2.29 and comparing the scores for hits longer than 200 bp. Similarly, we calculated reciprocal best BLAST hits between W302 or lyrpet4 and *A. lyrata* subsp. *lyrata* annotation v2.0 of strain MN47 v1.07 released by<sup>13</sup> for the Joint Genome Initiative (JGI) reference genome v1.07.

## Improving diploid assemblies using synteny

Both *A. halleri* and *A. lyrata* diverged recently<sup>2,14</sup> and each has 8 chromosomes<sup>15</sup> allowing us to use the *A. lyrata* subsp. *lyrata* strain MN47 v1.07 reference assembly<sup>16</sup> to perform genome-wide synteny analysis. The complete genome, coding sequences, and gene annotation of *A. lyrata* JGI were downloaded from the Phytozome v9.0 website (<http://phytozome.jgi.doe.gov>). Coding sequences of *A. lyrata* JGI were aligned to our *A. lyrata* lyrpet4 assembly using BLAT v3.5<sup>17</sup> with default parameters except maximum intron size. Because the longest intron in the *A. lyrata* lyrpet4 assembly was 44,703 bp, we set the maximum intron size to 50 kb. Hits were filtered, sorted, and merged into syntenic regions using custom Perl scripts (see the GitLab repository). We only considered the hits covering at least 85% of the query sequence and accepted the hit from a syntenic gene even when it did not have the highest score for the locus. If an *A. lyrata* lyrpet4 scaffold contained two neighboring loci that were syntenic to two *A. lyrata* JGI regions located on different chromosomes or more than 100 kb apart, the scaffold was split into two parts by removing the sequence of unknown nucleotides. Scaffolds were only split if the sequence of unknown

nucleotides N's at the cut site spanned at least 50 bp. After this correction, the scaffolds were sorted by length in descending order and named sequentially beginning with scaffold\_1. Because *A. kamchatica* is a self-compatible species, we were able to remove most heterozygosity by self-fertilization and we treated the subgenomes as haploid (i.e. 8 homozygous chromosomes in each subgenome).

We were interested in comparing homeolog diversity in genes surrounding the *HEAVY METAL ATPASE 4 (HMA4)* locus. By comparing synteny across multiple *Arabidopsis* species, we can increase the likelihood that homeologs separated by long distances or on multiple scaffolds are indeed syntenic in *A. kamchatica*. We used the published genomes of *A. lyrata* MN47 v1.07 and *A. thaliana* (TAIR, <https://www.arabidopsis.org/>) which are assemblies of entire chromosomes. We then compared both *A. halleri* W302 and *A. lyrata* v2.2 lyrpet4 regions surrounding the *HMA4* coding sequences. The heavy metal transporter *HMA4* contains three tandemly duplicated ATPase coding sequences in European and Asian *A. halleri*<sup>5,18</sup>. Following synteny analysis of the *HMA4* region, we are now able to examine genetic diversity over longer, contiguous, scaffold regions containing genes flanking *HMA4* coding genes to compare with the genomic background and between subgenomes. We centered the main genomic region containing the *HMA4* genes (3 tandem copies in *A. halleri* and *halleri*-origin homeologs and a single *lyrata*-origin copy in *A. kamchatica*) which we call "HMA4-M". The region spans 304 kb on H-origin scaffold\_116 and 155 kb in L-origin scaffold\_52. We then used the upstream (left-side) adjacent region ("HMA4-L", 125 kb for H-origin region and 183 kb in L-origin region), and the downstream adjacent (right-side) region ("HMA4-R", 105 kb in H-origin s0273 region and > 50 kb for L-origin region s0270). We also made alignments for the 118 genes in Fig. 2 in the main document with putative roles in metal tolerance, hyperaccumulation, metal ion transport, metal homeostasis were collected from the following resources:<sup>18-24</sup>.

### Reference assembly statistics

Our new *A. lyrata* assembly reduced the number of scaffolds from 281,536 from a previous version (v1.0, reported in<sup>4</sup> to 1675 in version 2.2. The genome sizes of our diploid genome assemblies are 196 Mb (of which 78.9 Mb is genes) for *A. halleri* and 175 Mb (of which 75.4 Mb is genes) for *A. lyrata* (Table 1, main text). Using flow cytometry, we estimated the genome size of *A. halleri* to be 250 Mb and for *A. lyrata* it is 225 Mb, indicating that our assembled genomes captured 78% and 77% of the total genomes of both species respectively. Using flow cytometry, we estimated a genome size of 460-480 Mb for *A. kamchatica* (with some variation between genotypes), indicating that the combined genome sizes of both diploids are very close to flow cytometry estimates for the allopolyploid.

The number of annotated genes in the *A. lyrata* v2.2 assembly (31,232) is similar to the number in our *A. halleri* (Tada Mine) v2.2 assembly (32,553), and to previously published *A. lyrata* subsp. *lyrata* (Hu et al. 2011) and *A. thaliana* gene annotations (Supplementary Table 1). Using reciprocal Blast hits (RBH) to determine orthology of the annotated gene models to *A. thaliana*, we found 21,433 *A. halleri* and 21,472 *A. lyrata* genes could be assigned to a TAIR10 gene ID. Based on these results, we identified 23,529 *halleri*-origin and *lyrata*-origin homeologs (Supplementary Table 2). Our *A. halleri* and *A. lyrata* v2.2 genome assemblies also show very similar numbers of blast hits to the JGI *A. lyrata* genome (Supplementary Table 3).

### Population Structure

To estimate population structure and phylogenetic relationships in our *A. kamchatica* accessions, we used SNPs from coding regions for a thousand randomly sampled *halleri* (22,896 SNPs) and *lyrata* (23,637 SNPs) homeologs. When we combined the SNPs for both subgenomes into a single dataset, the highest support for STRUCTURE<sup>25</sup> assignment was  $K = 2$ <sup>26</sup>, consistent with previous analyses<sup>1,27</sup>. When subgenomes were analyzed separately, different clusterings were observed. The highest supported structure assignments were  $K = 4$  for the *halleri*-subgenome and  $K = 3$  for the *lyrata*-subgenome (Supplementary Fig. 2).

Phylogenetic relationships of the 25 accessions were consistent with population structure clustering described above. In each of the three phylogenies, three clades are fairly well resolved: one large clade from the southern species range (most of Japan), another main clade from the northern range containing samples from Far East Russia and Alaska (Supplementary Fig. 2), and a separate small clade containing *A. kamchatica* subsp. *kawasakiana* accessions along with a few divergent accessions of *A. kamchatica* subsp. *kamchatica*. However, the relationship between these clades is different between the subgenomes. The clade containing subsp. *kawasakiana* is sister to the large Japanese in the *lyrata*-derived subgenome and it is sister to the Russia/Alaska clade in the *halleri*-derived subgenome (Supplementary Fig. 3). Different structure assignments and phylogenetic branching patterns between the subgenomes is not compatible with the scenario of a single origin of polyploidization, and supports that multiple parental individuals contributed to the origin of *A. kamchatica*.

### Homeolog specific PCR

We performed Sanger sequencing using homeolog specific PCR to validate the read sorting method using *halleri* or *lyrata*-origin SNPs for the following genes (TAIR10 IDs): AT1G02180, AT1G02290, AT1G02630 (*lyrata* only), AT1G17770, AT3G17360, AT3G10570, AT3G17611, AT4G01860 (*lyrata*

only), AT4G26610, AT4G36080 (KWS *halleri* only), AT5G13930: CHS, AT5G14750: WER. Sequence fragments ranged from 170 bp to 1500 bp comprising a total of ca. 10 kb in length for the MUR, PAK and KWS accessions (OHK accession was used for WER *halleri*-homeolog). We defined SNP positions based on differences between homeologous regions, where sequences were often enriched for SNPs due to highly divergent intron polymorphisms. The alignments consisted of 285 divergent positions between the two homeologs. Because most of these positions were represented multiple (up to three) *A. kamchatica* individuals, we counted a total of 1375 sites. Among these only three SNPs were present in Sanger sequences that were different than the NGS data out of 1375 total SNPs. However, the other SNPs in these sequences corresponded perfectly to their respective homeologous sequences and therefore still validated the read sorting method. We also had cases where double peaks were present in the Sanger sequences for one of the two homeologs, but in all cases the two SNPs correspond to those shown in the NGS data for both homeologs, so both homeologs were partially amplified. We nevertheless consider these cases as supporting the NGS data since one homeolog was supported by Sanger data and both alleles were present in the other sequences.

## Supplementary Figures

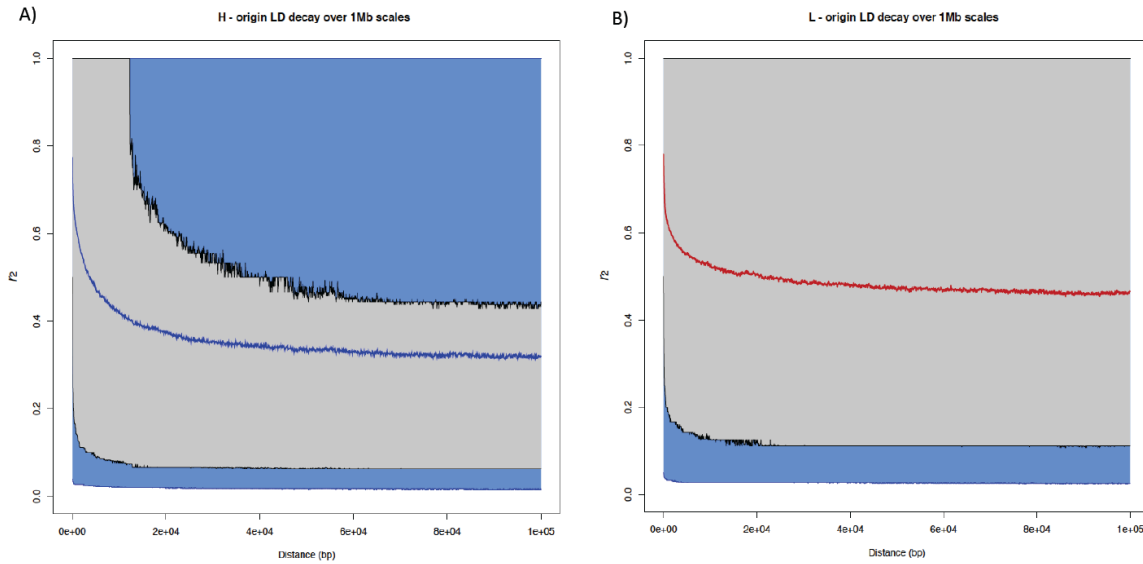

Supplementary Fig. 1. Linkage disequilibrium of *halleri*-origin (A) and *lyrata*-origin (B) subgenomes using 1 Mb windows along scaffolds. The blue (A) and red (B) curves represent the mean LD decay, while gray region is 50% confidence interval, and blue region is 90% confidence interval surrounding the means. The mean *lyrata*-origin LD remains at 0.47 while *halleri*-origin LD levels off at 0.34 at the scale of 1Mb genomic regions.

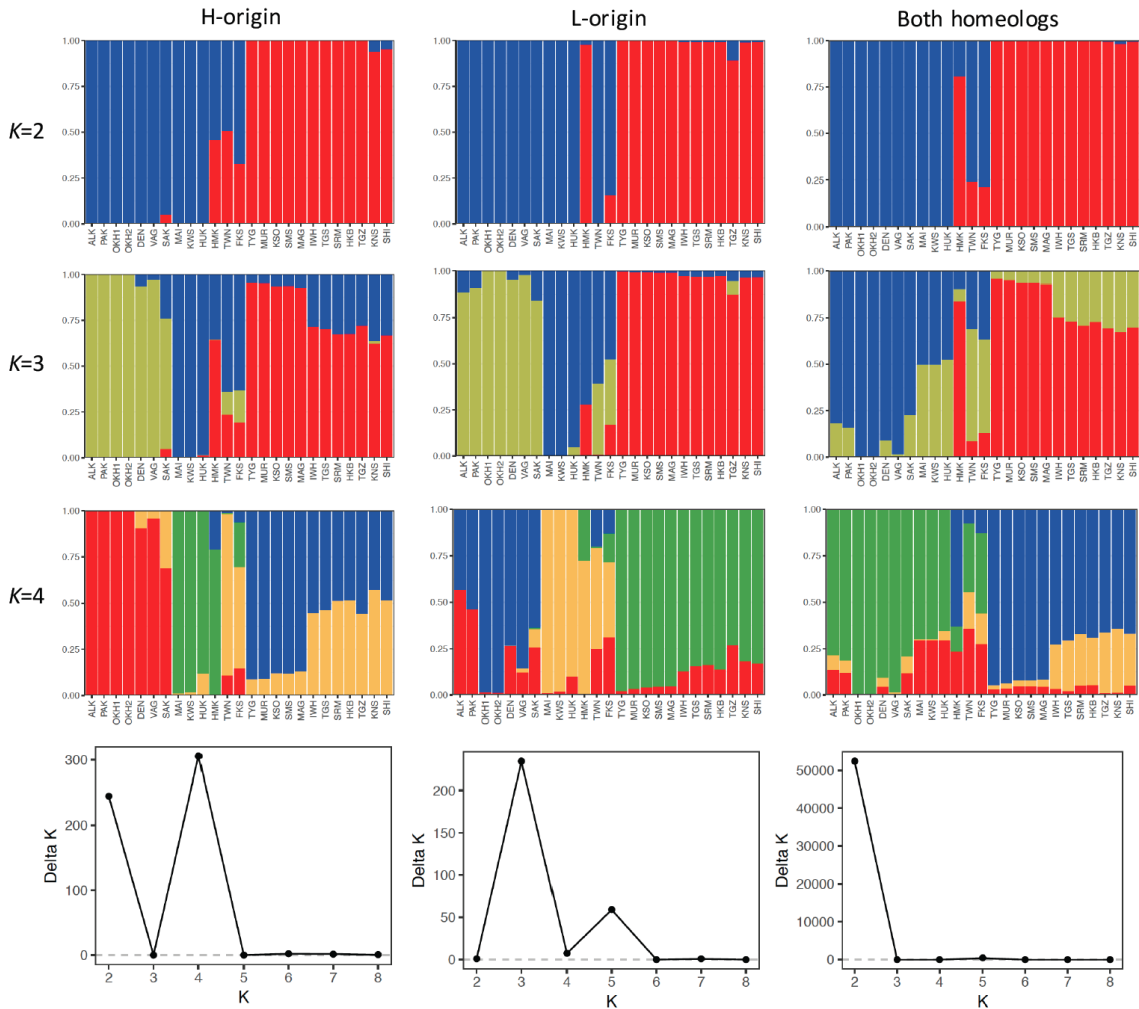

Supplementary Fig. 2. STRUCTURE assignments of *halleri* (H-origin) and *lyrata* (L-origin) derived homeologs for 25 *A. kamchatica* accessions for  $K = 2$  to  $K = 4$ . The third column is the STRUCTURE assignments using SNPs from both homeologs combined. The Delta  $K$ <sup>19</sup> plots show the most likely  $K$  group clustering to be  $K = 4$  for H-origin,  $K = 3$  for L-origin and  $K = 2$  using SNPs from both homeologs.

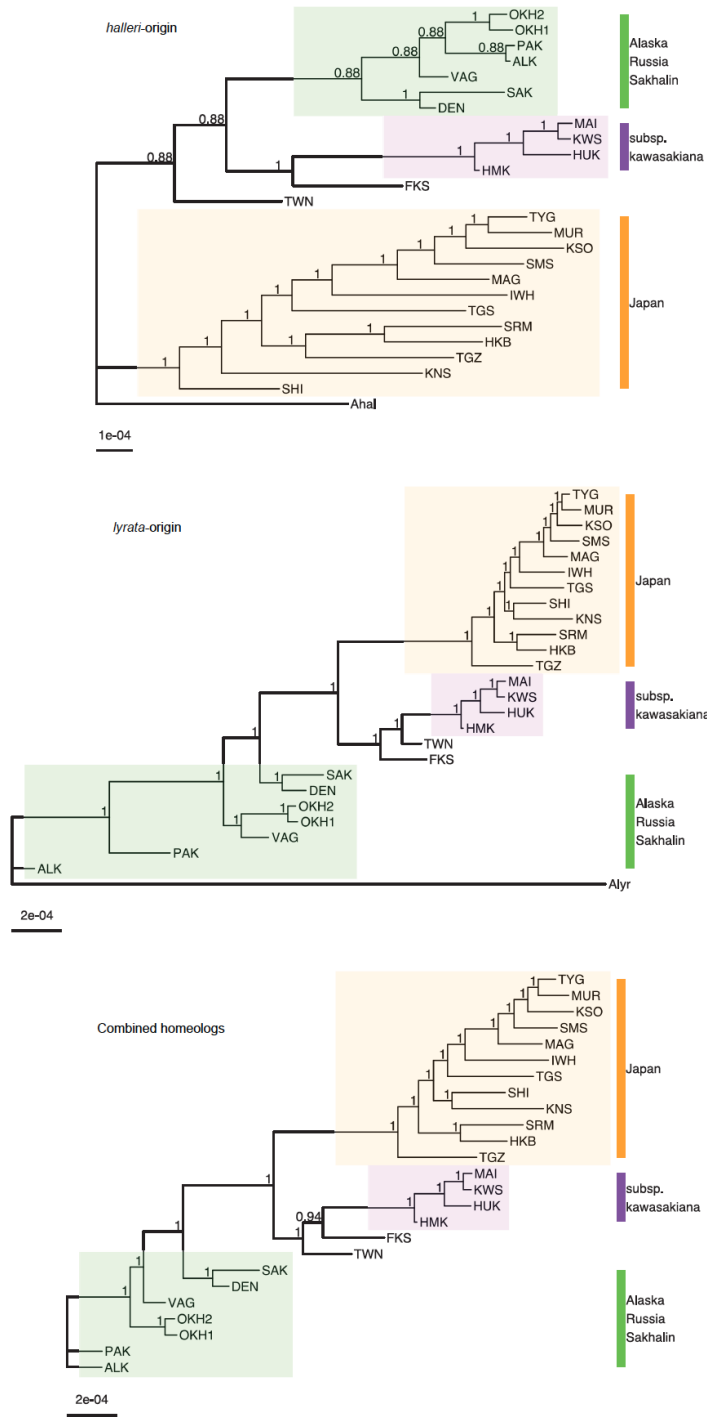

Supplementary Fig. 3. Phylogenetic relationships of 25 *A. kamchatica* accessions (top: *halleri*-genome; middle: *lyrata*-genome; bottom: both homeologs combined). Homeologs specific trees show clustering of a large clade of Japanese accessions (orange), and a distinct clade of northern latitude accessions (green) that are all *A. kamchatica* subsp. *kamchatica*. The small clustering of the *A. kamchatica* subsp. *kawasakiana* accessions is shown in purple, and is sister to the Japan clade in the *lyrata*-derived phylogeny, but sister to the Alaska/Russia in *halleri*-derived phylogeny. One accession from Taiwan is basal to the *kawasakiana* clade, and this lineage also contains an accession from Fukushima, Japan (FKS).



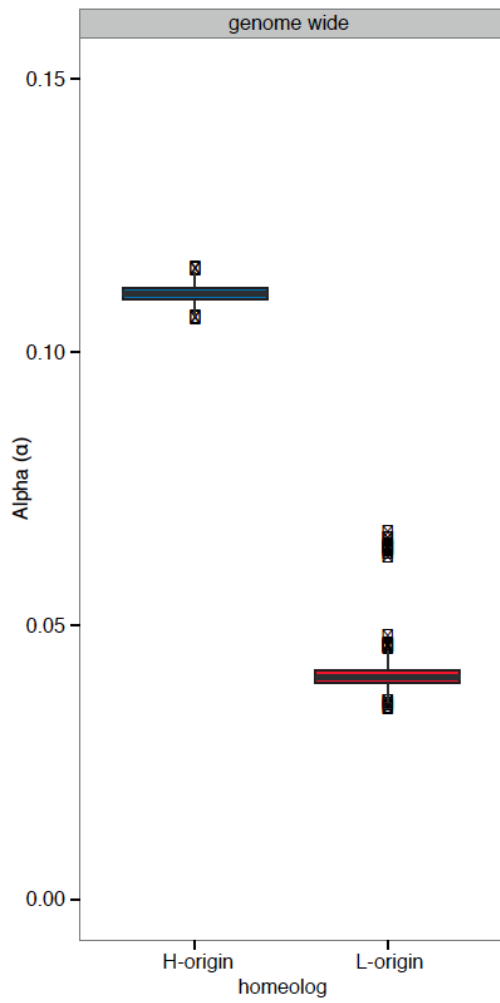

Supplementary Fig. 4. Estimates of adaptive evolution with all 25 *A. kamchatica* accessions. Mean  $\alpha$  for H-origin was 0.11 (CI:1.08e-1 , 1.14e-1) and for L-origin  $\alpha$  was 0.04 (CI: 3.68e-2 ,4.45e-2). CI are 95% confidence intervals.

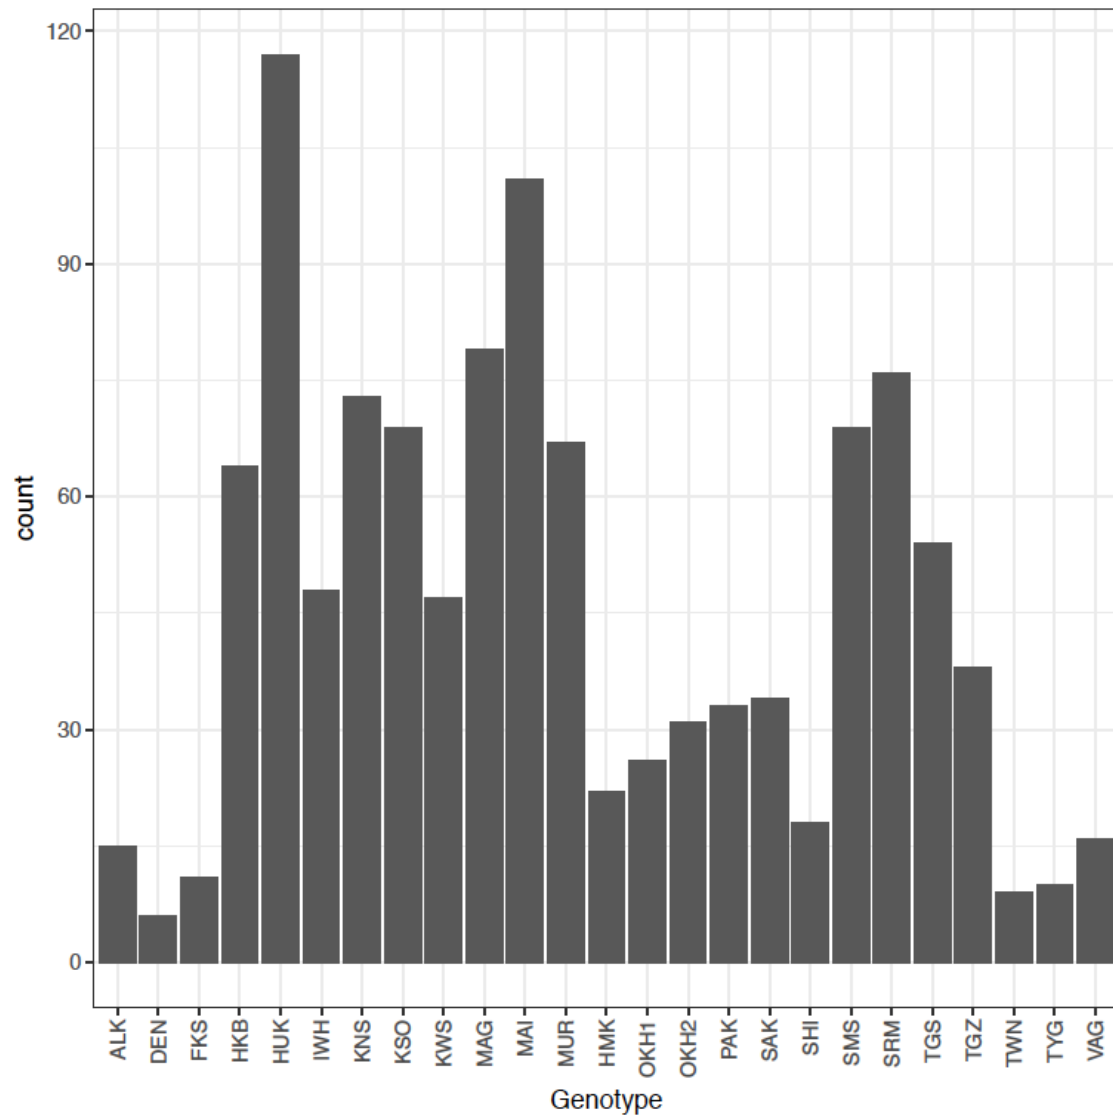

Supplementary Fig. 5. Frequencies of genes with high-impact mutations in each genotype when both homeologs have disruptive mutations (the distribution of 511 genes from Supplementary Table 7 below).

## Supplementary Tables

Supplementary Table 1. Gene annotation of v2.2 of Siberian *A. lyrata* subsp. *petraea* and v2.2 of *A. halleri* subsp. *gemmifera* (Tada Mine), Joint Genome Initiative (JGI) *A. lyrata* subsp. *lyrata*, and *A. thaliana*. Annotation of *A. halleri* and *A. lyrata* v2.2 assembly produced with RNAseq hints.

| Annotation                        | Genes  | mRNA   | Exons   |
|-----------------------------------|--------|--------|---------|
| <i>A. halleri</i> v2.2            | 32,553 | 34,553 | 187,838 |
| <i>A. lyrata</i> v2.2             | 31,232 | 33,157 | 181,219 |
| <i>A. lyrata</i> JGI <sup>a</sup> | 32,670 | 32,670 | NA      |
| <i>A. thaliana</i> <sup>b</sup>   | 28,775 | 35,386 | 215,909 |

a: *A. lyrata* MN47 v1.07 assembly genome annotation from<sup>13</sup> MN47 v1.07 genome assembly by Hu et al.<sup>16</sup>

b: *A. thaliana* genome annotation from TAIR10.

Supplementary Table 2. Reciprocal best BLAST hits among three *Arabidopsis* species genome assemblies using our v.2.2 gene annotations in Supplementary Table 1. Only the longest transcript per gene was selected for the analysis. Hits A on B: hits from BLAST alignment of genes from the gene annotation A against the gene annotation B; RBH: reciprocal best BLAST hits. *A. lyrata* MN47 v1.07 assembly genome annotation from Hu et al. (2011) available from JGI. *A. thaliana* TAIR10 annotation.

| Annotation A           | Annotation B          | Hits A on B | Hits B on A | RBH    |
|------------------------|-----------------------|-------------|-------------|--------|
| <i>A. halleri</i> v2.2 | <i>A. lyrata</i> v2.2 | 28,728      | 27,895      | 23,529 |
| <i>A. halleri</i> v2.2 | <i>A. thaliana</i>    | 25,328      | 23,728      | 21,433 |
| <i>A. halleri</i> v2.2 | <i>A. lyrata</i> JGI  | 26,402      | 26,917      | 22,447 |
| <i>A. lyrata</i> v2.2  | <i>A. lyrata</i> JGI  | 25,820      | 26,985      | 22,894 |
| <i>A. lyrata</i> v2.2  | <i>A. thaliana</i>    | 24,689      | 23,720      | 21,472 |
| <i>A. thaliana</i>     | <i>A. lyrata</i> JGI  | 24,033      | 25,716      | 21,941 |

Supplementary Table 3. List of 25 *A. kamchatica* accessions, sampling locations and sequencing depth. (See accompanying Excel file).

| Accession | Species                                                 | Location                                                                    | lat_lon      | Reads       | total_Coverage | Sorted_Ahal | Sorted_Alyr | orted_Common | Total_Ahal | Total_Alyr | Cov_Ahal | Cov_Alyr |
|-----------|---------------------------------------------------------|-----------------------------------------------------------------------------|--------------|-------------|----------------|-------------|-------------|--------------|------------|------------|----------|----------|
| ALK       | <i>Arabidopsis kamchatica</i> subsp. <i>kamchatica</i>  | USA: Alaska, Richardson Highway, South of Darling Creek bridge              | 63.4N 145.8W | 41,222,868  | 8.8            | 14,118,890  | 10,796,478  | 1,121,305    | 15,172,336 | 1,851,960  | 7.8      | 6.8      |
| DEN       | <i>Arabidopsis kamchatica</i> subsp. <i>kamchatica</i>  | Russia: Kamchatskii krai, near the river Denokhonok                         | 54.2N 158.1E | 29,858,928  | 6.3            | 10,393,815  | 7,703,567   | 764,879      | 11,122,492 | 8,427,447  | 5.7      | 4.9      |
| FKS       | <i>Arabidopsis kamchatica</i> subsp. <i>kamchatica</i>  | Japan: Fukushima                                                            | 37.2N 139.9E | 40,709,648  | 8.7            | 14,460,719  | 10,002,155  | 1,729,908    | 16,138,372 | 1,676,183  | 8.3      | 6.7      |
| HKB       | <i>Arabidopsis kamchatica</i> subsp. <i>kamchatica</i>  | Japan: Hakubayari                                                           | 36.7N 137.8E | 83,323,614  | 17.7           | 29,795,327  | 22,072,831  | 2,089,056    | 31,789,560 | 3,049,797  | 16.4     | 13.9     |
| HMK       | <i>Arabidopsis kamchatica</i> subsp. <i>kawasakiana</i> | Japan: Toyama                                                               | 36.7N 137.3E | 70,437,142  | 15             | 23,995,643  | 17,543,808  | 1,878,282    | 25,794,172 | 9,323,093  | 13.3     | 11.1     |
| HUK       | <i>Arabidopsis kamchatica</i> subsp. <i>kawasakiana</i> | Japan: Hukuiinoura                                                          | 34.6N 136.6E | 106,898,796 | 22.7           | 37,136,448  | 27,677,971  | 2,750,024    | 39,756,647 | 10,274,808 | 20.5     | 17.5     |
| IWH       | <i>Arabidopsis kamchatica</i> subsp. <i>kamchatica</i>  | Japan: Iwahana                                                              | 35.9N 137.8E | 52,549,196  | 11.2           | 18,872,866  | 14,148,184  | 1,425,613    | 20,239,313 | 5,500,712  | 10.4     | 8.9      |
| KNS       | <i>Arabidopsis kamchatica</i> subsp. <i>kamchatica</i>  | Japan: Kinasa                                                               | 36.7N 138.0E | 91,705,866  | 19.5           | 32,746,897  | 24,388,091  | 2,336,948    | 34,975,970 | 6,595,190  | 18       | 15.3     |
| KSO       | <i>Arabidopsis kamchatica</i> subsp. <i>kamchatica</i>  | Japan: Kisokomagatake                                                       | 35.8N 137.8E | 82,333,488  | 17.5           | 29,916,953  | 22,331,282  | 2,216,628    | 32,037,117 | 4,432,965  | 16.5     | 14.1     |
| KWS       | <i>Arabidopsis kamchatica</i> subsp. <i>kawasakiana</i> | Japan: Takashima                                                            | 35.4N 136.0E | 57,556,260  | 12.2           | 18,879,180  | 13,938,194  | 1,710,830    | 20,528,832 | 5,573,108  | 10.6     | 9        |
| MAG       | <i>Arabidopsis kamchatica</i> subsp. <i>kamchatica</i>  | Japan: Magosazima                                                           | 35.3N 138.3E | 100,480,490 | 21.4           | 35,909,855  | 26,847,065  | 2,604,139    | 38,400,425 | 9,310,981  | 19.8     | 16.9     |
| MAI       | <i>Arabidopsis kamchatica</i> subsp. <i>kawasakiana</i> | Japan: Maiamihama                                                           | 35.1N 136.0E | 99,558,822  | 21.2           | 34,004,362  | 25,237,282  | 2,475,873    | 36,363,640 | 7,575,460  | 18.7     | 15.9     |
| MUR       | <i>Arabidopsis kamchatica</i> subsp. <i>kamchatica</i>  | Japan: Murodo                                                               | 36.2N 137.4E | 92,156,804  | 19.6           | 28,450,072  | 20,969,486  | 1,884,357    | 30,239,914 | 2,723,204  | 15.6     | 13.1     |
| OKH1      | <i>Arabidopsis kamchatica</i> subsp. <i>kamchatica</i>  | Russia: Khabarovsk krai, Okhotskii raion, foothills of Mt. Lanzhinskie gory | 59.4N 143.3E | 47,972,636  | 10.2           | 16,240,333  | 12,120,236  | 1,057,909    | 17,225,075 | 3,098,741  | 8.9      | 7.6      |
| OKH2      | <i>Arabidopsis kamchatica</i> subsp. <i>kamchatica</i>  | Russia: Khabarovsk krai, Okhotskii raion, foothills of Mt. Lanzhinskie gory | 59.4N 143.3E | 45,097,050  | 9.6            | 15,717,431  | 11,766,389  | 1,179,854    | 16,842,632 | 2,882,931  | 8.7      | 7.4      |
| PAK       | <i>Arabidopsis kamchatica</i> subsp. <i>kamchatica</i>  | USA: Alaska, Potter                                                         | 61.2N 149.3W | 180,109,152 | 38.3           | 27,117,743  | 20,836,034  | 2,642,737    | 29,631,690 | 3,318,884  | 15.3     | 13.4     |
| SAK       | <i>Arabidopsis kamchatica</i> subsp. <i>kamchatica</i>  | Russia: Sakhalin, Marakovskii raion, Zaozernoye                             | 48.4N 142.7E | 51,986,358  | 11.1           | 16,978,097  | 12,521,408  | 1,214,392    | 18,133,252 | 3,663,380  | 9.3      | 7.9      |
| SHI       | <i>Arabidopsis kamchatica</i> subsp. <i>kamchatica</i>  | Japan: Shirakawa                                                            | 36.3N 136.9E | 36,818,198  | 7.8            | 12,491,175  | 9,099,814   | 863,158      | 13,310,606 | 9,909,963  | 6.9      | 5.7      |
| SMS       | <i>Arabidopsis kamchatica</i> subsp. <i>kamchatica</i>  | Japan: Simasimadani                                                         | 36.2N 137.8E | 82,024,638  | 17.4           | 28,623,779  | 21,103,492  | 2,121,047    | 30,651,632 | 3,110,874  | 15.8     | 13.3     |
| SRM       | <i>Arabidopsis kamchatica</i> subsp. <i>kamchatica</i>  | Japan: Mt. Shiroma                                                          | 36.8N 137.8E | 103,381,614 | 22             | 37,373,380  | 27,889,832  | 2,881,603    | 40,139,114 | 6,636,345  | 20.7     | 17.7     |
| TGS       | <i>Arabidopsis kamchatica</i> subsp. <i>kamchatica</i>  | Japan: Mt. Shikokutsurugi                                                   | 33.9N 134.1E | 64,747,706  | 13.8           | 23,060,935  | 16,670,868  | 1,747,686    | 24,729,621 | 8,328,385  | 12.7     | 10.6     |
| TGZ       | <i>Arabidopsis kamchatica</i> subsp. <i>kamchatica</i>  | Japan: Tsurugigozen                                                         | 36.6N 137.6E | 49,130,130  | 10.4           | 17,080,259  | 12,600,990  | 1,278,910    | 18,304,390 | 3,814,192  | 9.4      | 8        |
| TWN       | <i>Arabidopsis kamchatica</i> subsp. <i>kamchatica</i>  | Taiwan: Taroko national park                                                | 24.0N 121.3E | 27,214,840  | 5.8            | 9,374,591   | 6,723,726   | 725,941      | 10,068,892 | 7,412,536  | 5.2      | 4.3      |
| TYG       | <i>Arabidopsis kamchatica</i> subsp. <i>kamchatica</i>  | Japan: Tateyamagawa                                                         | 36.6N 137.6E | 33,247,108  | 7.1            | 11,084,924  | 8,145,924   | 755,793      | 11,802,582 | 8,856,608  | 6.1      | 5.1      |
| VAG       | <i>Arabidopsis kamchatica</i> subsp. <i>kamchatica</i>  | Russia: Kamchatskii krai, near the river Vaktan Ganal'skii                  | 53.5N 157.6E | 40,538,374  | 8.6            | 13,933,714  | 10,460,424  | 960,743      | 14,843,746 | 1,362,106  | 7.6      | 6.6      |

Supplementary Table 4. Diversity and polymorphism statistics of both subgenomes by sliding window analysis.

| Ahal whole genome | bases     | Bases (%) polym | Polym   | nucDiv | $\theta_w$ | $\pi$  |
|-------------------|-----------|-----------------|---------|--------|------------|--------|
| overall           | 163517656 | 1               | 1138032 | 0.007  | 0.0017     | 0.0018 |
| gene              | 75291060  | 0.4604          | 454338  | 0.006  | 0.0015     | 0.0016 |
| coding            | 38896876  | 0.2379          | 216194  | 0.0056 | 0.0014     | 0.0015 |
| intron            | 22946734  | 0.1403          | 154633  | 0.0067 | 0.0017     | 0.0017 |
| intergenic        | 83592223  | 0.5112          | 660511  | 0.0079 | 0          | 0.0035 |

  

| Alyr whole genome | bases     | Bases (%) polym | Polym  | nucDiv | $\theta_w$ | $\pi$  |
|-------------------|-----------|-----------------|--------|--------|------------|--------|
| overall           | 149864674 | 1               | 946600 | 0.0063 | 0.0017     | 0.0017 |
| gene              | 72299008  | 0.4824          | 436107 | 0.006  | 0.0016     | 0.0016 |
| coding            | 37093072  | 0.2475          | 205023 | 0.0055 | 0.0015     | 0.0015 |
| intron            | 21685851  | 0.1447          | 146380 | 0.0068 | 0.0018     | 0.0018 |
| intergenic        | 74042836  | 0.4941          | 496233 | 0.0067 | 0          | 0.0034 |

Supplementary Table 5. Estimated effective ( $N_e$ ) population sizes using empirical diversity estimates and published mutation accumulation rates. The calculation of  $N_e = \pi_{syn}/4\mu$  using the mutation rate from Koch et al.<sup>28</sup> used only synonymous diversity while the calculation using Ossowski et al.<sup>29</sup> used total diversity.

| Species                                               | $\pi_{syn}$ | $\pi_{total}$ | $N_e$ (1) | $N_e$ (2) |
|-------------------------------------------------------|-------------|---------------|-----------|-----------|
| <i>A. kamchatica</i>                                  | 0.0046      | 0.0015        | 77000     | 53571     |
| <i>A. halleri</i>                                     | 0.028       | 0.0097        | 466667    | 364202    |
| <i>A. lyrata</i>                                      | 0.029       | 0.0102        | 483333    | 345041    |
| (1) Koch et al. <sup>28</sup> mutation rate $\mu$     | 1.50E-08    |               |           |           |
| (2) Ossowski et al. <sup>29</sup> mutation rate $\mu$ | 7.00E-09    |               |           |           |

Supplementary Table 6. Samples used for estimating DFE and  $\alpha$  in Fig. 4A and E in main text. Illumina reads from European *A. halleri* and *A. lyrata* were obtained from<sup>30</sup>. SNPs in diploid parents were phased and separated into two alleles, indicated by \_1 and \_2 following accession number. To get equal sample size, *A. lyrata* alleles and *A. kamchatica* samples were chosen at random.

| <i>A. kamchatica</i> | <i>A. lyrata</i> | <i>A. halleri</i> |
|----------------------|------------------|-------------------|
| ALK                  | SRR2040790_1     | SRR2040780_1      |
| DEN                  | SRR2040791_2     | SRR2040780_2      |
| HKB                  | SRR2040792_1     | SRR2040782_1      |
| IWH                  | SRR2040793_2     | SRR2040782_2      |
| KNS                  | SRR2040794_1     | SRR2040783_1      |
| KSO                  | SRR2040795_1     | SRR2040783_2      |
| MAG                  | SRR2040795_2     | SRR2040784_1      |
| MUR                  | SRR2040796_2     | SRR2040784_2      |
| OKH1                 | SRR2040797_2     | SRR2040785_1      |
| OKH2                 | SRR2040798_1     | SRR2040785_2      |
| PAK                  | SRR3111438_2     | SRR2040786_1      |
| SAK                  | SRR3111439_1     | SRR2040786_2      |
| SHI                  | SRR3111439_2     | SRR2040787_1      |
| SMS                  | SRR3111440_1     | SRR2040787_2      |
| SRM                  | SRR3111441_1     | SRR2040810_1      |
| TGS                  | SRR3111441_2     | SRR2040810_2      |
| TGZ                  | SRR3111442_2     | SRR3107262_1      |
| VAG                  | SRR3111443_1     | SRR3107262_2      |



Supplementary Table 7. High impact mutations. Counts are the number of homeologs with one or more of any of the mutation types.

| <b>Homeolog</b>                       | <b>frameshift variant</b> | <b>start lost</b> | <b>stop gained</b> | <b>stop lost</b> | <b>total<sup>a</sup></b> | <b>% total</b> |
|---------------------------------------|---------------------------|-------------------|--------------------|------------------|--------------------------|----------------|
| H-origin                              | 3311                      | 282               | 1662               | 190              | 4219                     | 20.78          |
| L-origin                              | 4014                      | 423               | 2002               | 251              | 4952                     | 24.39          |
| Shared in both homeologs <sup>b</sup> |                           |                   |                    |                  | 1559                     | 7.68           |
| Shared in genotypes <sup>c</sup>      |                           |                   |                    |                  | 511                      | 2.52           |

a: total number of homeologs with one or more high impact mutations (multiple mutation types are possible in a single homeolog)

b: total number of genes with high impact mutations in both homeologs out of 25 individuals

c: total number of high impact mutations in both homeologs in a single individual

Supplementary Table 8. Gene Ontology of high impact mutations for premature stop codon and frameshift combined for *halleri* (A) and *lyrata* (B) derived coding sequences. (C) GO analysis of genes with any of the four high impact mutation types (from Supplementary Table 6) where both homeologs in a single genotype had disruptive mutations.

| H-origin                                      |           |                                    |           |            |         |          |          |         |
|-----------------------------------------------|-----------|------------------------------------|-----------|------------|---------|----------|----------|---------|
| GO_acc                                        | term_type | Term                               | queryitem | querytotal | refitem | reftotal | pvalue   | FDR     |
| GO:0003824                                    | F         | catalytic activity                 | 1507      | 4273       | 6350    | 19936    | 6.90E-05 | 0.036   |
| GO:0016787                                    | F         | hydrolase activity                 | 567       | 4273       | 2285    | 19936    | 0.00014  | 0.036   |
| GO:0001883                                    | F         | purine nucleoside binding          | 260       | 4273       | 983     | 19936    | 0.00015  | 0.036   |
| GO:0001882                                    | F         | nucleoside binding                 | 260       | 4273       | 983     | 19936    | 0.00015  | 0.036   |
| GO:0030554                                    | F         | adenyl nucleotide binding          | 260       | 4273       | 983     | 19936    | 0.00015  | 0.036   |
| GO:0019825                                    | F         | oxygen binding                     | 58        | 4273       | 159     | 19936    | 1.10E-05 | 0.011   |
| GO:0012501                                    | P         | programmed cell death              | 45        | 4273       | 111     | 19936    | 4.60E-06 | 0.012   |
| GO:0008236                                    | F         | serine-type peptidase activity     | 42        | 4273       | 115     | 19936    | 0.00016  | 0.036   |
| GO:0017171                                    | F         | serine hydrolase activity          | 42        | 4273       | 115     | 19936    | 0.00016  | 0.036   |
| GO:0006915                                    | P         | apoptosis                          | 32        | 4273       | 61      | 19936    | 1.10E-07 | 0.00056 |
| GO:0004888                                    | F         | transmembrane receptor activity    | 31        | 4273       | 64      | 19936    | 1.60E-06 | 0.0033  |
| L-origin                                      |           |                                    |           |            |         |          |          |         |
| GO_acc                                        | term_type | Term                               | queryitem | querytotal | refitem | reftotal | pvalue   | FDR     |
| GO:0016787                                    | F         | hydrolase activity                 | 663       | 5031       | 2285    | 19936    | 5.90E-05 | 0.022   |
| GO:0017076                                    | F         | purine nucleotide binding          | 346       | 5031       | 1146    | 19936    | 0.00013  | 0.03    |
| GO:0001882                                    | F         | nucleoside binding                 | 314       | 5031       | 983     | 19936    | 2.50E-06 | 0.0019  |
| GO:0001883                                    | F         | purine nucleoside binding          | 314       | 5031       | 983     | 19936    | 2.50E-06 | 0.0019  |
| GO:0030554                                    | F         | adenyl nucleotide binding          | 314       | 5031       | 983     | 19936    | 2.50E-06 | 0.0019  |
| GO:0032559                                    | F         | adenyl ribonucleotide binding      | 294       | 5031       | 927     | 19936    | 8.80E-06 | 0.0044  |
| GO:0005524                                    | F         | ATP binding                        | 292       | 5031       | 921     | 19936    | 9.70E-06 | 0.0044  |
| GO:0017111                                    | F         | nucleoside-triphosphatase activity | 185       | 5031       | 574     | 19936    | 0.00013  | 0.03    |
| GO:0019825                                    | F         | oxygen binding                     | 61        | 5031       | 159     | 19936    | 0.00019  | 0.04    |
| GO:0008236                                    | F         | serine-type peptidase activity     | 48        | 5031       | 115     | 19936    | 8.40E-05 | 0.024   |
| GO:0017171                                    | F         | serine hydrolase activity          | 48        | 5031       | 115     | 19936    | 8.40E-05 | 0.024   |
| Shared in both homeologs in a single genotype |           |                                    |           |            |         |          |          |         |
| GO_acc                                        | term_type | Term                               | queryitem | querytotal | refitem | reftotal | pvalue   | FDR     |
| GO:0060089                                    | F         | molecular transducer activity      | 17        | 497        | 239     | 19936    | 0.00014  | 0.013   |
| GO:0004871                                    | F         | signal transducer activity         | 17        | 497        | 239     | 19936    | 0.00014  | 0.013   |
| GO:0004872                                    | F         | receptor activity                  | 11        | 497        | 95      | 19936    | 2.90E-05 | 0.0052  |
| GO:0012501                                    | P         | programmed cell death              | 11        | 497        | 111     | 19936    | 0.00012  | 0.042   |
| GO:0004888                                    | F         | transmembrane receptor activity    | 10        | 497        | 64      | 19936    | 4.50E-06 | 0.0016  |
| GO:0006915                                    | P         | apoptosis                          | 9         | 497        | 61      | 19936    | 2.10E-05 | 0.015   |

## Supplementary References

1. Shimizu-Inatsugi, R. *et al.* The allopolyploid *Arabidopsis kamchatica* originated from multiple individuals of *Arabidopsis lyrata* and *Arabidopsis halleri*. *Mol. Ecol.* **18**, 4024–4048 (2009).
2. Schmickl, R., Jørgensen, M. H., Brysting, A. K. & Koch, M. A. The evolutionary history of the *Arabidopsis lyrata* complex: a hybrid in the amphi-Beringian area closes a large distribution gap and builds up a genetic barrier. *BMC Evol. Biol.* **10**, 98 (2010).
3. Tsuchimatsu, T. *et al.* Evolution of self-compatibility in *Arabidopsis* by a mutation in the male specificity gene. *Nature* **464**, 1342–1346 (2010).
4. Akama, S., Shimizu-Inatsugi, R., Shimizu, K. K. & Sese, J. Genome-wide quantification of homeolog expression ratio revealed nonstochastic gene regulation in synthetic allopolyploid *Arabidopsis*. *Nucleic Acids Res.* **42**, e46–e46 (2014).
5. Briskine, R. V. *et al.* Genome assembly and annotation of *Arabidopsis halleri*, a model for heavy metal hyperaccumulation and evolutionary ecology. *Mol. Ecol. Resour.* (2016). doi:10.1111/1755-0998.12604
6. Butler, J. *et al.* ALLPATHS: De novo assembly of whole-genome shotgun microreads. *Genome Res.* **18**, 810–820 (2008).
7. AUGUSTUS Development Team. Incorporating RNAseq data into AUGUSTUS with TopHat. (2014). Available at: <http://bioinf.uni-greifswald.de/bioinf/wiki/pmwiki.php?n=IncorporatingRNAseq.Tophat>. (Accessed: 15th January 2015)
8. Paape, T. *et al.* Conserved but Attenuated Parental Gene Expression in Allopolyploids: Constitutive Zinc Hyperaccumulation in the Allotetraploid *Arabidopsis kamchatica*. *Mol. Biol. Evol.* **33**, 2781–2800 (2016).
9. Dobin, A. *et al.* STAR: ultrafast universal RNA-seq aligner. *Bioinformatics* **29**, 15–21 (2013).
10. Smit, A., Hubley, R. & Green, P. RepeatMasker Open-3.0. (1996). Available at: <http://www.repeatmasker.org>.
11. Langmead, B. & Salzberg, S. L. Fast gapped-read alignment with Bowtie 2. *Nat. Methods* **9**, 357–359 (2012).
12. Tomato Genome Consortium. The tomato genome sequence provides insights into fleshy fruit evolution. *Nature* **485**, 635–641 (2012).

13. Rawat, V. *et al.* Improving the Annotation of *Arabidopsis lyrata* Using RNA-Seq Data. *PLOS ONE* **10**, e0137391 (2015).
14. Roux, C. *et al.* Does Speciation between *Arabidopsis halleri* and *Arabidopsis lyrata* Coincide with Major Changes in a Molecular Target of Adaptation? *PLoS ONE* **6**, e26872 (2011).
15. Al-Shehbaz, I. A. & O’Kane, S. L. Taxonomy and Phylogeny of *Arabidopsis* (Brassicaceae). *Arab. Book* **1**, e0001 (2002).
16. Hu, T. T. *et al.* The *Arabidopsis lyrata* genome sequence and the basis of rapid genome size change. *Nat. Genet.* **43**, 476–481 (2011).
17. Kent, W. J. BLAT—The BLAST-Like Alignment Tool. *Genome Res.* **12**, 656–664 (2002).
18. Hanikenne, M. *et al.* Evolution of metal hyperaccumulation required cis-regulatory changes and triplication of HMA4. *Nature* **453**, 391–395 (2008).
19. Arrivault, S., Senger, T. & Krämer, U. The *Arabidopsis* metal tolerance protein AtMTP3 maintains metal homeostasis by mediating Zn exclusion from the shoot under Fe deficiency and Zn oversupply. *Plant J.* **46**, 861–879 (2006).
20. Filatov, V. *et al.* Comparison of gene expression in segregating families identifies genes and genomic regions involved in a novel adaptation, zinc hyperaccumulation: GENE EXPRESSION IN SEGREGATING FAMILIES. *Mol. Ecol.* **15**, 3045–3059 (2006).
21. Talke, I. N. Zinc-Dependent Global Transcriptional Control, Transcriptional Deregulation, and Higher Gene Copy Number for Genes in Metal Homeostasis of the Hyperaccumulator *Arabidopsis halleri*. *PLANT Physiol.* **142**, 148–167 (2006).
22. Shahzad, Z. *et al.* The Five AhMTP1 Zinc Transporters Undergo Different Evolutionary Fates towards Adaptive Evolution to Zinc Tolerance in *Arabidopsis halleri*. *PLoS Genet.* **6**, e1000911 (2010).
23. Lamesch, P. *et al.* The *Arabidopsis* Information Resource (TAIR): improved gene annotation and new tools. *Nucleic Acids Res.* **40**, D1202–D1210 (2012).
24. Shahzad, Z. *et al.* *Plant Defensin type 1 (PDF1)*: protein promiscuity and expression variation within the *Arabidopsis* genus shed light on zinc tolerance acquisition in *Arabidopsis halleri*. *New Phytol.* **200**, 820–833 (2013).
25. Pritchard, J. K., Stephens, M. & Donnelly, P. Inference of population structure using multilocus genotype data. *Genetics* **155**, 945–959 (2000).

26. Evanno, G., Regnaut, S. & Goudet, J. Detecting the number of clusters of individuals using the software structure: a simulation study. *Mol. Ecol.* **14**, 2611–2620 (2005).
27. Tsuchimatsu, T., Kaiser, P., Yew, C.-L., Bachelier, J. B. & Shimizu, K. K. Recent Loss of Self-Incompatibility by Degradation of the Male Component in Allotetraploid *Arabidopsis kamchatica*. *PLoS Genet.* **8**, e1002838 (2012).
28. Koch, M. A., Haubold, B. & Mitchell-Olds, T. Comparative Evolutionary Analysis of Chalcone Synthase and Alcohol Dehydrogenase Loci in *Arabidopsis*, *Arabis*, and Related Genera (Brassicaceae). *Mol. Biol. Evol.* **17**, 1483–1498 (2000).
29. Ossowski, S. *et al.* The Rate and Molecular Spectrum of Spontaneous Mutations in *Arabidopsis thaliana*. *Science* **327**, 92–94 (2010).
30. Novikova, P. Y. *et al.* Sequencing of the genus *Arabidopsis* identifies a complex history of nonbifurcating speciation and abundant trans-specific polymorphism. *Nat. Genet.* **48**, 1077–1082 (2016)
